# Supplementary material for: Hyperthermic intraperitoneal chemotherapy for management of gastrointestinal and biliary tract malignancies: a systematic review and meta-analysis of randomized trials
Source: PubMed Central journal article supplement — Ann Gastroenterol. 2022 Nov 15;36(1):87–96. doi: 10.20524/aog.2023.0758 (PMC9756031; doi:10.20524/aog.2023.0758), 2022-11-15
Supplement: AnnGastroenterol-36-87_Suppl1.pdf [file AnnGastroenterol-36-87_Suppl1.pdf]

## Supplementary material

**Supplementary Table 1** Future HIPEC trials

| Indication       | Country     | Cancer type                | Treatment ARMS                                                                              |
|------------------|-------------|----------------------------|---------------------------------------------------------------------------------------------|
| NCT01882933      | France      | Gastric                    | surgery+HIPEC vs. surgery alone                                                             |
| NCT02528110      | China       | Gastric                    | surgery+HIPEC vs. surgery alone                                                             |
| NCT02240524      | China       | Gastric                    | surgery+HIPEC+chemotherapy vs. surgery+chemotherapy                                         |
| NCT02356276      | China       | Gastric                    | surgery+HIPEC+chemotherapy vs. surgery+chemotherapy                                         |
| NCT02158988      | Germany     | Gastric                    | neoadjuvant+surgery+HIPEC+adjuvant vs. neoadjuvant+surgery+adjuvant                         |
| NCT02960061      | China       | Gastric                    | neoadjuvant+surgery+HIPEC+adjuvant vs. neoadjuvant+surgery+peritoneal lavage+adjuvant       |
| NCT02381847      | China       | Gastric                    | surgery+HIPEC vs. surgery alone                                                             |
| NCT02396498      | China       | Gastric                    | surgery+HIPEC+chemotherapy+S-1 vs. surgery+chemotherapy+S-1                                 |
| NCT04447352      | Germany     | Gastric                    | neoadjuvant+surgery+HIPEC+adjuvant vs. neoadjuvant+surgery+adjuvant                         |
| NCT03023436      | China       | Gastric                    | surgery+HIPEC vs. chemotherapy alone                                                        |
| NCT03348150      | Netherlands | Gastric                    | surgery+HIPEC vs. systematic chemotherapy                                                   |
| NCT03917173      | Italy       | Gastric                    | surgery+HIPEC vs. surgery alone                                                             |
| ChiCTR1900024552 | China       | Gastric                    | neoadjuvant HIPEC+neoadjuvant chemo+surgery+HIPEC+adjuvant chemo vs. surgery+adjuvant chemo |
| NCT02614534      | Spain       | Colorectal                 | surgery+HIPEC vs. surgery alone                                                             |
| NCT02974556      | Italy       | Colorectal                 | surgery+HIPEC+adjuvant vs. surgery+adjuvant                                                 |
| NCT02179489      | China       | Colorectal                 | surgery+HIPEC vs. surgery alone                                                             |
| NCT02830139      | China       | Colorectal                 | surgery+HIPEC+adjuvant vs. surgery+adjuvant                                                 |
| NCT02965248      | China       | Colorectal                 | surgery+HIPEC+adjuvant vs. surgery+adjuvant                                                 |
| NCT01628211      | Italy       | Colorectal                 | second look laparoscopy+HIPEC vs. standard follow up                                        |
| NCT01815359      | USA         | Colorectal and appendiceal | surgery+HIPEC vs. surgery+EPIC                                                              |
| NCT03914820      | Italy       | Colorectal                 | surgery+HIPEC vs. surgery alone                                                             |

HIPEC, hyperthermic intraperitoneal chemotherapy
